# Supplementary material for: Relationship between key continuous glucose monitoring-derived metrics and specific cognitive domains in patients with type 2 diabetes mellitus
Source: Research Square preprint supplement (doi:10.21203/rs.3.rs-2357399/v1), 2023-01-03
Supplement: Supplementary file 1 [file 973a2f2dfa8f3bcc27a657ad.docx]

Supplementary table 3 Neuropsychological test information by tertiles of TIR

| Variable | TIR < 57% | 57% ≤ TIR < 79% | TIR ≥ 79% | P value |
| --- | --- | --- | --- | --- |
| Sample | 32 | 32 | 32 | - |
| TBR population (n, %) | 6 (18.75%) | 19 (59.38%) | 19 (59.38%) | 0.001 |
| MMSE | 28.00 (27.00, 29.00) | 27.00 (26.00, 28.75) | 28.00 (27.00, 29.00) | 0.062 |
| MoCA | 23.00 (22.00, 26.00) | 23.00 (20.00, 24.75） | 23.50 (21.00, 25.00) | 0.471 |
| Immediate memory total score | 24.00 ± 5.20 | 21.91 ± 4.50 | 23.50 ± 5.59 | 0.237 |
| 20-min delayed recall | 7.75 ± 2.50 | 8.00 ± 2.76 | 8.28 ± 2.75 | 0.730 |
| Cued recall | 10.00 (8.25, 11.00) | 10.00 (8.00, 11.75) | 11.00 (9.00, 11.00) | 0.731 |
| Long delayed recognition | 12.00 (10.00, 13.00) | 12.00 (10.00, 14.00) | 12.00 (11.00, 13.00) | 0.867 |
| DST forward | 7.00 (6.00, 8.00) | 6.50 (6.00, 8.00) | 7.00 (6.00, 8.00) | 0.656 |
| DST backward | 4.00 (4.00, 5.00) | 4.00 (3.00, 5.00） | 4.00 (3.25, 5.00) | 0.572 |
| TMTA | 40.90 (32.90, 60.25) | 68.82 (39.00, 150.00) | 39.61 (31.39, 140.15) | 0.052 |
| TMTB | 84.00 (58.44, 300.00) | 300.00 (76.73, 300.00) | 217.00 (47.39, 300.00) | 0.099 |
| BNT | 24.00 (22.25, 27.00) | 23.00 (19.25, 25.00) | 25.00 (22.25, 27.75) | **0.020** |
| CDT | 2.00 (2.00, 3.00) | 3.00 (2.00, 3.00) | 2.00 (2.00, 3.00） | 0.509 |
| VFT | 18.00 (16.00, 21.00） | 16.00 (14.00, 18.00) | 17.50 (14.00, 22.00） | 0.108 |
| Depression scale | 52.50 (47.50, 57.50） | 50.00 (47.50, 55.00） | 53.75 (47.50, 57.43) | 0.561 |
| Negative emotion | 83.00 (74.00, 91.75) | 90.00 (77.00, 97.00) | 87.00 (80.00, 91.00) | 0.329 |

Data are presented as means (standard deviations) or medians (interquartile ranges) for continuous variables or numbers (percentages) for categorical variables. A two-tailed value of *p* < 0.05 was considered as statistically significant (bold).

MMSE, Mini-Mental State Examination; MoCA, Montreal Cognitive Assessment (MoCA); DST, Digit Span Test; TMT, Trail Making Test; BNT, Boston Naming Test; CDT, Clock Drawing Test; VFT, Verbal Fluency Test; TIR, time in range; TBR, time below range.
