# Supplementary material for: Relationship between key continuous glucose monitoring-derived metrics and specific cognitive domains in patients with type 2 diabetes mellitus
Source: Research Square preprint supplement (doi:10.21203/rs.3.rs-2357399/v1), 2023-01-03
Supplement: Supplementary file 2 [file bdb52bdbaafab44e0402874b.docx]

Supplementary table 1 Neuropsychological test information by TBR 3.0-3.8 group

| Variable | T ≥ 3.9 | TBR 3.0-3.8 | P value |
| --- | --- | --- | --- |
| Sample | 52 | 31 | - |
| MMSE | 28.00 (27.00, 29.00) | 28.00 (26.00, 29.00) | 0.488 |
| MoCA | 23.37 ± 2.69 | 22.55 ± 3.31 | 0.223 |
| Immediate memory total score | 23.81 ± 5.07 | 22.74 ± 5.27 | 0.364 |
| 20-min delayed recall | 8.33 ± 2.20 | 7.58 ± 3.07 | 0.203 |
| Cued recall | 10.50 (9.00, 11.75) | 10.00 (8.00, 11.00) | 0.090 |
| Long delayed recognition | 12.00 (11.00, 13.75) | 12.00 (10.00, 14.00) | 0.816 |
| DST forward | 7.00 (6.00, 8.00) | 6.00 (6.00, 7.00) | 0.103 |
| DST backward | 4.00 (4.00, 5.00) | 4.00 (4.00, 5.00) | 0.847 |
| TMTA | 38.43 (32.43, 60.25) | 61.00 (35.46, 150.00) | **0.037** |
| TMTB | 88.00 (57.93, 300.00) | 300.00 (69.00, 300.00) | 0.146 |
| BNT | 23.50 (22.00, 27.00) | 24.00 (21.00, 26.00) | 0.715 |
| CDT | 3.00 (2.00, 3.00) | 2.00 (1.00, 3.00) | **0.010** |
| VFT | 18.00 ± 4.31 | 17.81 ± 5.50 | 0.859 |
| Depression scale | 52.68 ± 7.22 | 53.19 ± 5.67 | 0.738 |
| Negative emotion | 83.73 ± 13.71 | 83.97 ± 9.62 | 0.933 |

Data are presented as means (standard deviations) or medians (interquartile ranges) for continuous variables or numbers (percentages) for categorical variables. A two-tailed value of *p* < 0.05 was considered as statistically significant (bold).

MMSE, Mini-Mental State Examination; MoCA, Montreal Cognitive Assessment ; DST, Digit Span Test; TMT, Trail Making Test; BNT, Boston Naming Test; CDT, Clock Drawing Test; VFT, Verbal Fluency Test; T ≥ 3.9, time ≥ 3.9; TBR, time below range.
