# Supplementary material for: Relationship between key continuous glucose monitoring-derived metrics and specific cognitive domains in patients with type 2 diabetes mellitus
Source: Research Square preprint supplement (doi:10.21203/rs.3.rs-2357399/v1), 2023-01-03
Supplement: Supplementary file 3 [file ff3f5584d36e77e64ca1b9b5.docx]

Supplementary table 2 Association between neuropsychological test information and TIR/GRI/CV/MAGE

|  | MMSE | MoCA | Immediate memory total score | 20-min delayed recall | Cued recall | Long delayed recognition | DST forward | DST backward |
| --- | --- | --- | --- | --- | --- | --- | --- | --- |
| TIR | -0.140 | -0.150 | -0.108 | 0.043 | 0.086 | 0.035 | -0.102 | -0.116 |
| GRI | 0.160 | 0.160 | 0.064 | -0.094 | -0.154 | -0.038 | 0.087 | 0.049 |
| CV | -0.064 | 0.019 | -0.137 | -0.036 | 0.012 | 0.125 | -0.040 | -0.125 |
| MAGE | -0.007 | 0.081 | 0.054 | -0.051 | 0.013 | 0.067 | 0.021 | -0.029 |

|  | TMTA | TMTB | BNT | CDT | VFT | Depression scale | Negative emotion |
| --- | --- | --- | --- | --- | --- | --- | --- |
| TIR | 0.182 | 0.059 | -0.046 | -0.116 | -0.083 | 0.052 | -0.093 |
| GRI | -0.179 | -0.061 | 0.089 | 0.065 | 0.084 | -0.028 | 0.032 |
| CV | 0.074 | 0.031 | 0.017 | -0.081 | 0.009 | -0.011 | -0.057 |
| MAGE | -0.141 | -0.047 | -0.037 | 0.034 | 0.012 | -0.028 | -0.011 |

TIR, time in range; GRI, glycemia risk index; CV, coefficient of variation; MAGE, mean amplitude of glycemic excursion; MMSE, Mini-Mental State Examination; MoCA, Montreal Cognitive Assessment (MoCA); DST, Digit Span Test; TMT, Trail Making Test; BNT, Boston Naming Test; CDT, Clock Drawing Test; VFT, Verbal Fluency Test.

Model was adjusted for age, sex, duration of disease, education and BMI.
